# Supplementary material for: Dimeric phenanthroimidazole for blue electroluminescent materials: the effect of substituted position attached to biphenyl center
Source: Royal Society of Chemistry journal article supplement (doi:10.1039/c4cp00209a), 2014-01-01
Supplement: c4cp00209a1.pdf [file c4cp00209a1.pdf]

Supporting Information

*for Physical Chemistry Chemical Physics*

**Dimeric Phenanthroimidazole for Blue Electroluminescent Materials: The Effect of Substituted Position Attaching to Biphenyl Center**

**Zhiming Wang<sup>a\*</sup>, Ying Feng<sup>a</sup>, Hui Li<sup>a</sup>, Zhao Gao<sup>b</sup>, Xiaojuan Zhang<sup>a</sup>, Ping Lu<sup>b</sup>,  
Ping Chen<sup>c\*</sup>, Yuguang Ma<sup>b</sup>, Shiyong Liu<sup>c</sup>**

<sup>a</sup>School of Petrochemical Engineering, Shenyang University of Technology, Liaoyang 111003, China.

<sup>b</sup>State Key Laboratory of Supramolecular Structure and Materials, Jilin University, Changchun 130012, China

<sup>c</sup>State Key Laboratory on Integrated Optoelectronics, College of Electronic Science and Engineering, Jilin University, Changchun 130012, China

## Synthesis and Characterization

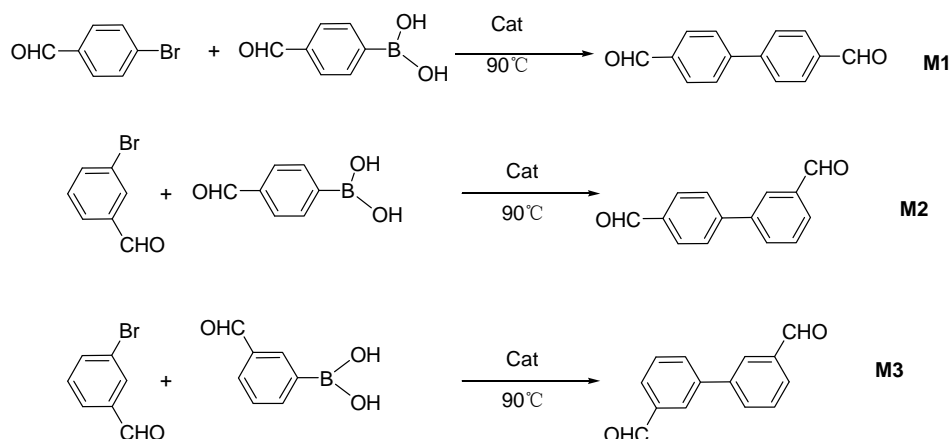

**Scheme S1** The synthetic routes of the corresponding biphenyl dicarboxaldehyde

### *Biphenyldicarboxaldehyde (M)*

A mixture of 4-bromobenzaldehyde (or 3-bromobenzaldehyde, 2.1 g, 11.2 mmol), 4-formylphenylboronic acid (3-formylphenylboronic acid, 1.65 g, 11.0 mmol), Pd(PPh<sub>3</sub>)<sub>4</sub> (128.0 mg, 0.11 mmol, 1 %), sodium carbonate (5.3 g, 50 mmol), THF (150 mL) and distilled water (25 mL) was refluxed for 2 days under nitrogen. The crude product was purified by column chromatography on silica gel using CH<sub>2</sub>Cl<sub>2</sub>/CH<sub>3</sub>COOC<sub>2</sub>H<sub>5</sub> as eluent to afford a yellow solid.

### *4,4'-Biphenyldicarboxaldehyde (M1)*

The raw materials are 4-bromobenzaldehyde and 4-formylphenylboronic acid. (1.89 g, Yield: 80.5%) MALDI-TOF (*m/z*): [M<sup>+</sup>] calcd. C<sub>14</sub>H<sub>10</sub>O<sub>2</sub>, 210.07; found, 211.9.

### *3,4'-Biphenyldicarboxaldehyde (M2)*

The raw materials are 3-bromobenzaldehyde and 4-formylphenylboronic acid. (2.10 g, Yield: 84.3%) MALDI-TOF (*m/z*): [M<sup>+</sup>] calcd. C<sub>14</sub>H<sub>10</sub>O<sub>2</sub>, 210.07; found, 211.0.

### *3,3'-Biphenyldicarboxaldehyde (M3)*

The raw materials are 3-bromobenzaldehyde and 3-formylphenylboronic acid. (2.15 g, Yield: 85.0%) MALDI-TOF (*m/z*): [M<sup>+</sup>] calcd. C<sub>14</sub>H<sub>10</sub>O<sub>2</sub>, 210.07; found, 211.7.

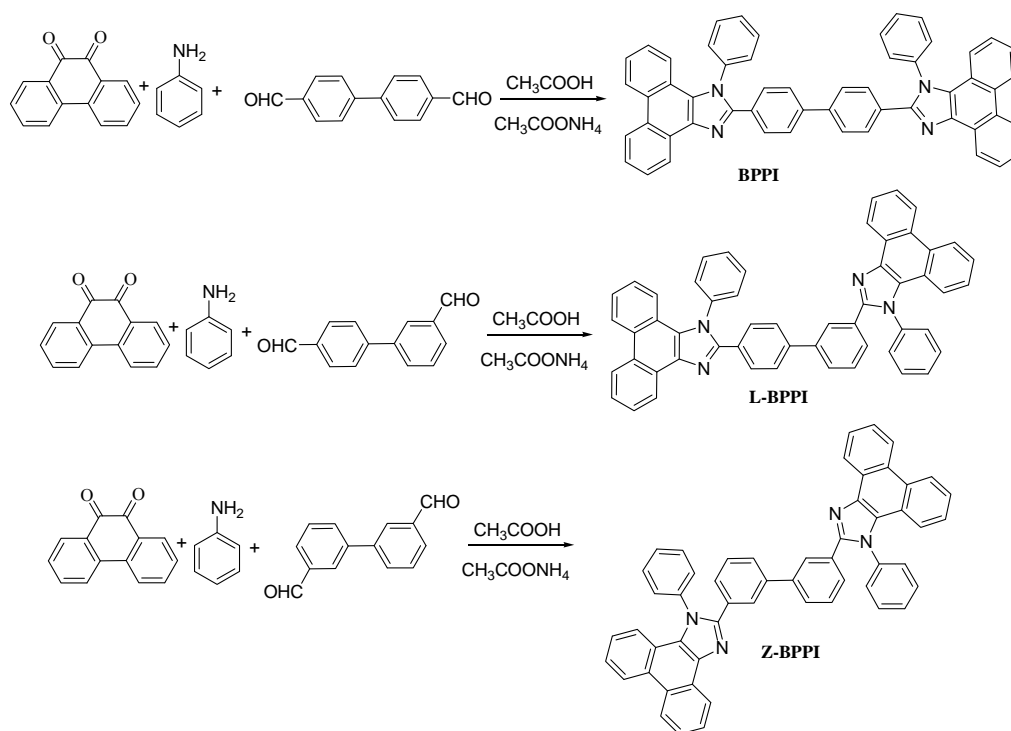

**Scheme S2** The synthetic routes of **BPPI**, **L-BPPI** and **Z-BPPI**

***Bis(1-phenyl-1H-phenanthro[9,10-d]imidazol-2-yl)biphenyl***

A mixture of phenanthrene-9,10-dione (1.04 g, 5 mmol), aniline (3.57 g, 30 mmol), ammonium acetate (3.05 g, 50 mmol) and M1 (or M2, or M3, 0.55g, 2.4 mmol) were refluxed in acetate acid for 2 hours, then poured into a methanol solution with stirring. After filtering, the crude product was purified by chromatography.

***4,4'-bis(1-phenyl-1H-phenanthro[9,10-d]imidazol-2-yl)biphenyl (BPPI)***

(3.16g, Yield:83.3% )  $^1\text{H}$  NMR (500 MHz, DMSO, ppm): 8.94 (d, 2H), 8.89 (d, 2H), 8.72 (d, 2H), 7.80–7.65 (m, 22H), 7.57 (t, 2H), 7.35 (t, 2H) , 7.09 (d, 2H). MALDI-TOF ( $m/z$ ):  $[\text{M}^+]$  calcd.  $\text{C}_{54}\text{H}_{34}\text{N}_4$ , 738.28; found, 739.0. Anal Calc. for  $\text{C}_{54}\text{H}_{34}\text{N}_4$ : C, 87.78; H, 4.64; N, 7.58. Found: C, 87.80; H, 4.62; N, 7.57.

***3,4'-bis(1-phenyl-1H-phenanthro[9,10-d]imidazol-2-yl)biphenyl (L-BPPI)***

(2.84g, Yield:73.6% )  $^1\text{H}$  NMR (500 MHz, DMSO, ppm): 8.97 (d, 2H), 8.91 (d, 2H), 8.74 (d, 2H), 7.82–7.70 (m, 17H), 7.67 (d, 2H), 7.58 (t, 2H) ,7.51 (t, 1H) , 7.45(d, 2H), 7.37 (t, 2H), 7.16-7.12(m, 2H). MALDI-TOF ( $m/z$ ):  $[\text{M}^+]$  calcd.  $\text{C}_{54}\text{H}_{34}\text{N}_4$ , 738.28;

found, 739.9. Anal Calc. for C<sub>54</sub>H<sub>34</sub>N<sub>4</sub>: C, 87.78; H, 4.64; N, 7.58. Found: C, 87.67; H, 4.61; N, 7.55.

***3,3'-bis(1-phenyl-1H-phenanthro[9,10-d]imidazol-2-yl)biphenyl (Z-BPPI)***

(2.76g, Yield:75.4% ) <sup>1</sup>H NMR (500 MHz, DMSO, ppm): 8.97 (d, 2H), 8.92 (d, 2H), 8.78 (d, 2H), 7.83-7.79 (m, 6H), 7.75-7.71 (m, 6H), 7.67-7.64 (m, 6H), 7.61 (t, 2H), 7.48 (m, 4H) ,7.38 (t, 2H), 7.15 (d, 2H). MALDI-TOF (*m/z*): [M<sup>+</sup>] calcd. C<sub>54</sub>H<sub>34</sub>N<sub>4</sub>, 738.28; found, 741.0. Anal Calc. for C<sub>54</sub>H<sub>34</sub>N<sub>4</sub>: C, 87.78; H, 4.64; N, 7.58. Found: C, 87.76; H, 4.64; N, 7.57.
